# Supplementary material for: A highly selective and sensitive ESIPT-based coumarin–triazole polymer for the ratiometric detection of Hg2+
Source: Royal Society of Chemistry journal article supplement (doi:10.1039/c9nj01366k), 2019-01-01
Supplement: c9nj01366k1.pdf [file c9nj01366k1.pdf]

## A highly selective and sensitive ESIPT-based coumarin-triazole polymer for the ratiometric detection of $\text{Hg}^{2+}$

Jean Marie Vianney Ngororabanga\*, Zenixole R. Tshentu and Neliswa Mama

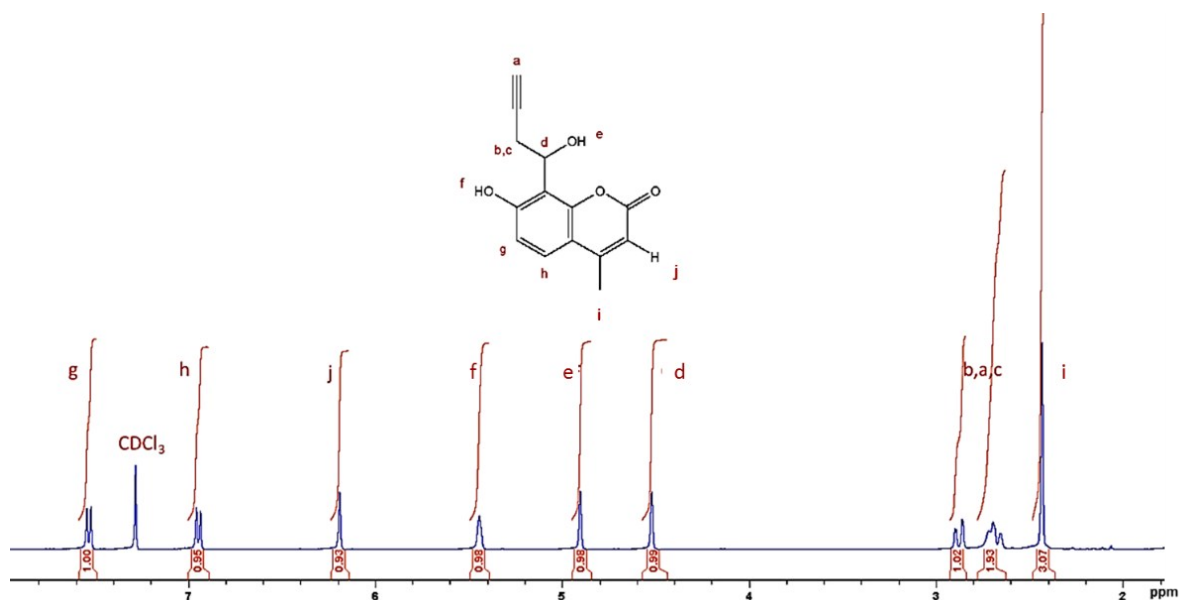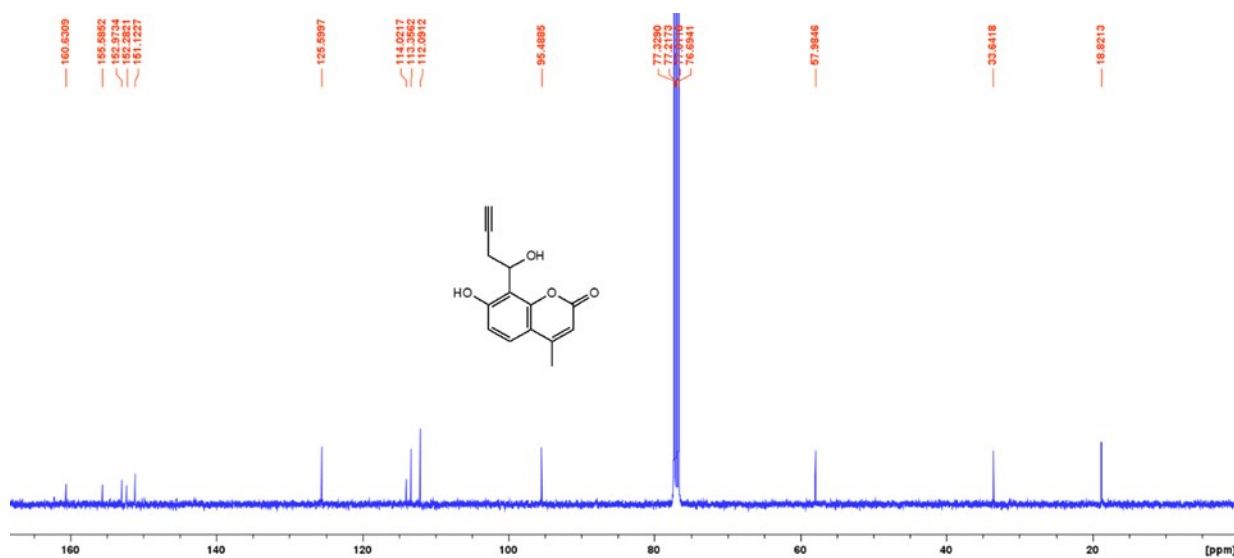

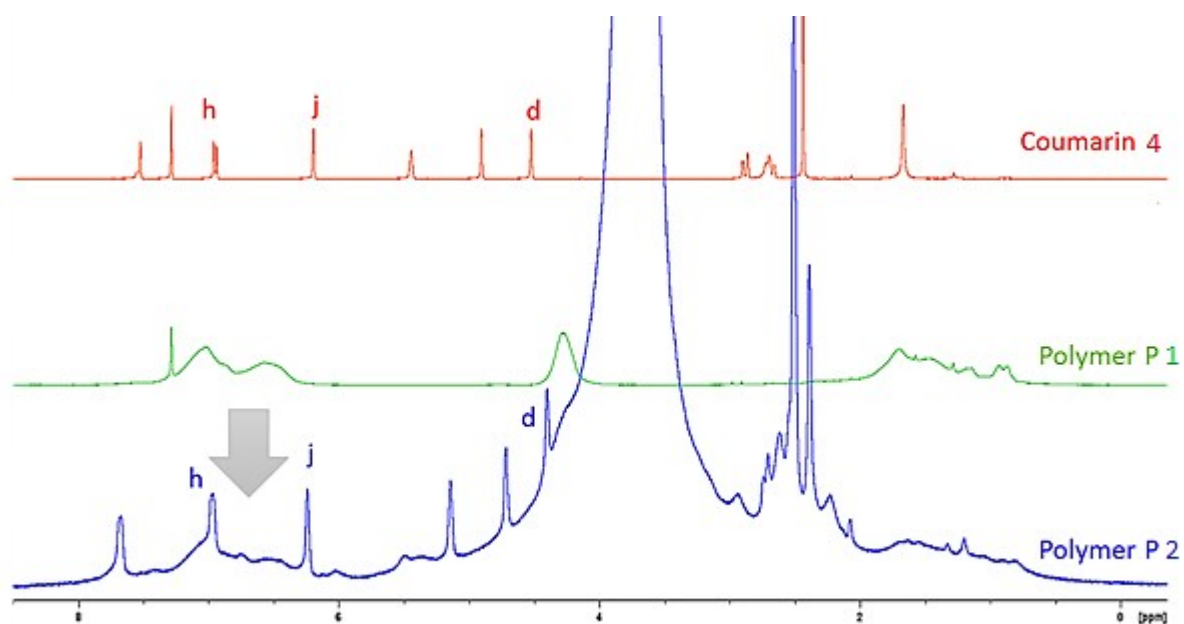

**Figure S3:**  $^1\text{H}$  NMR spectra of coumarin **4**, **P1** and **P2**. For coumarin **4** and **P1**  $\text{CDCl}_3$  was used as NMR solvent and  $\text{DMSO-d}_6$  was used for **P2**.

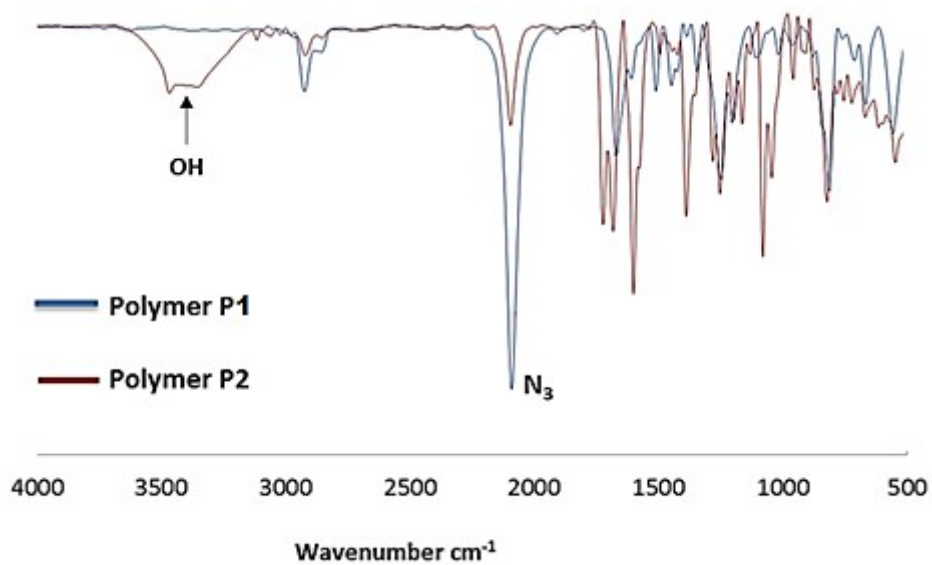

**Figure S4:** FT-IR spectra of polymer **P1** and the functionalized polymer **P2**.

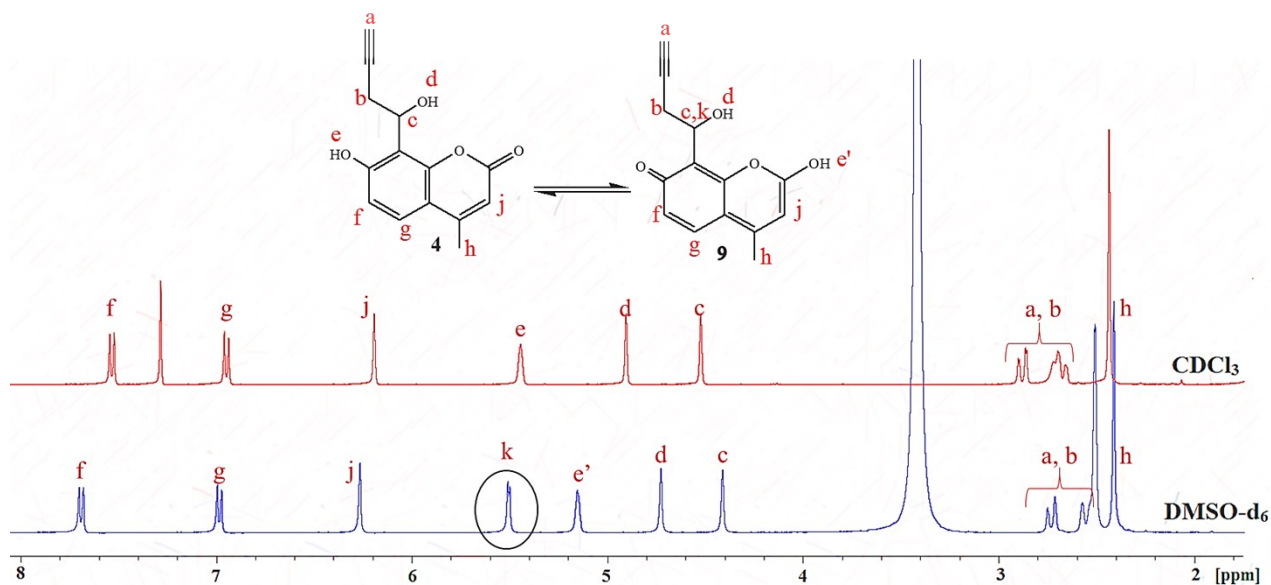

Figure S5: Comparison of <sup>1</sup>H NMR of **4** in CDCl<sub>3</sub> and in DMSO-d<sub>6</sub>.

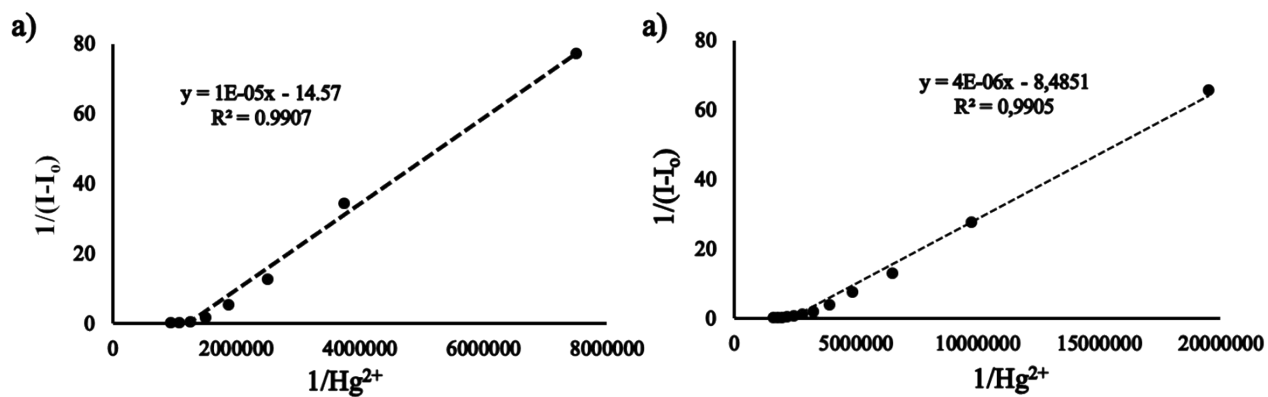

Figure S6: Benesi-Hildebrand plot of **4** (a) and **P2** (b) with Hg<sup>2+</sup> ( $\lambda_{\text{ex}} = 330 \text{ nm}$ ).
